# Supplementary material for: Runx1 is required for progression of CD41+ embryonic precursors into HSCs but not prior to this
Source: Oxford University Press journal article supplement (doi:10.1242/dev.110841), 2014-08-19
Supplement: dev110841_supp.pdf [file dev110841_supp.pdf]

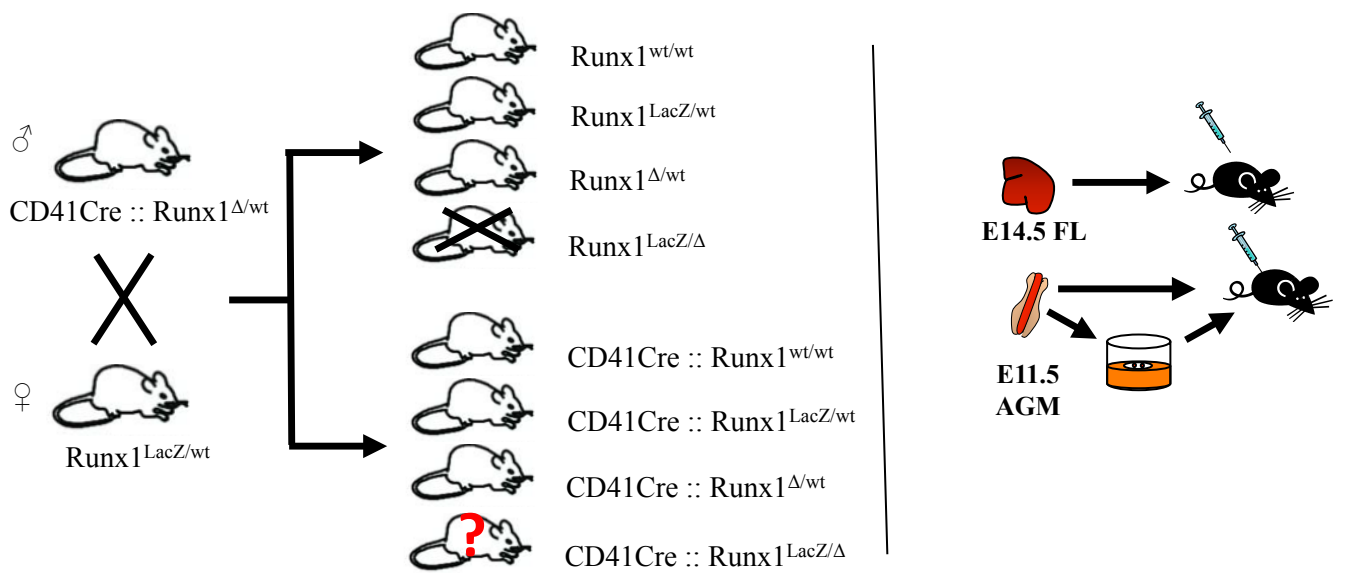

**Fig. S1. Crossing strategy.** Mouse crossing to reactivate  $Runx1^{LacZ}$  locus *in vivo* in the CD41 compartment. Statistically, every 1 of 8 embryos is reactivated.

**A**

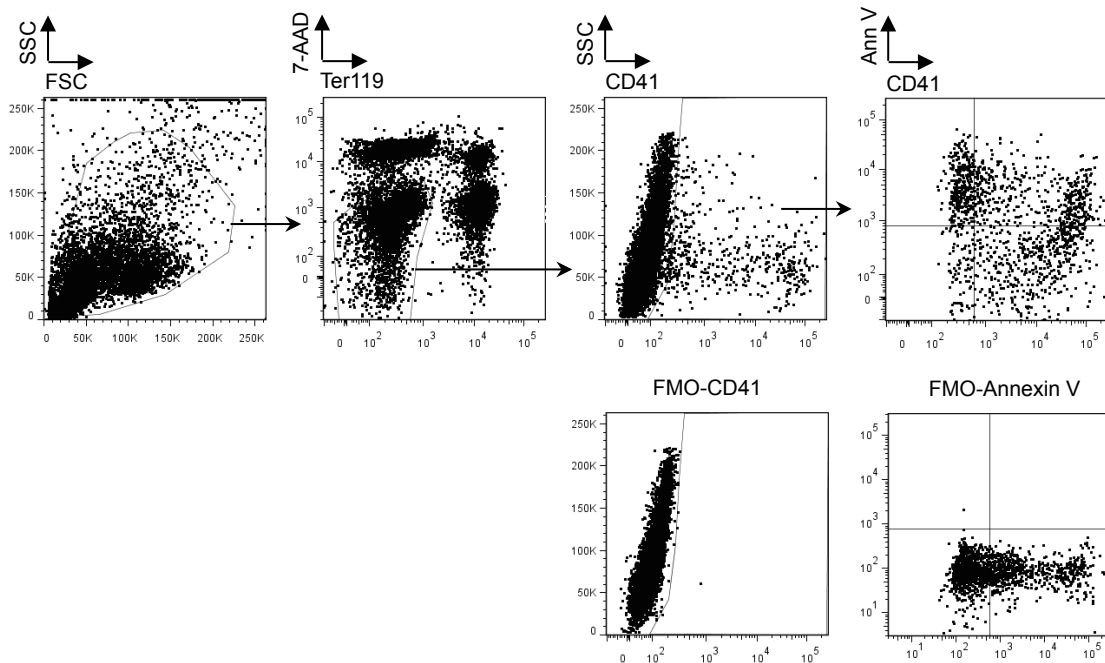

**B**

| Sample   | Hematopoietic clusters and cells in Ao |                           |                                            |                                   | CD45 in surrounding tissues*   |                   |
|----------|----------------------------------------|---------------------------|--------------------------------------------|-----------------------------------|--------------------------------|-------------------|
|          | Casp-3+ (total no.) clusters           | Casp-3+ (total no.) cells | % apoptotic cells in intra-aortic clusters | % apoptotic intra-aortic clusters | CD45+Casp-3+ (total no.) cells | % apoptotic cells |
| embryo 1 | 7 (16)                                 | 10 (71)                   | 14.1                                       | 43.8                              | 35 (79)                        | 44.3              |
| embryo 2 | 11 (26)                                | 22 (106)                  | 20.8                                       | 42.3                              | 55 (117)                       | 47.0              |
| embryo 3 | 8 (16)                                 | 10 (78)                   | 12.80                                      | 50.0                              | 14 (45)                        | 31.1              |
| embryo 4 | 3 (12)                                 | 5 (48)                    | 10.40                                      | 25.0                              | 42 (91)                        | 46.2              |
| embryo 5 | 16 (29)                                | 25 (119)                  | 21.0                                       | 55.2                              | 28 (78)                        | 35.9              |

**Fig. S2. Analysis of apoptotic cells in AGM region. (A)** Gating strategy for analysis of Annexin V staining in the E10.5 CD41+ population. FMO controls for CD41 and Annexin V stainings are shown in the lower row. **(B)** Active Caspase3 staining in E11.5 intra-aortic clusters and CD45+ cells in the mesenchyme surrounding the dorsal aorta
